# Supplementary material for: Combination of ethyl acetate fraction from Calotropis gigantea stem bark and sorafenib induces apoptosis in HepG2 cells
Source: PubMed Central journal article supplement (PMC10962855; doi:10.1371/journal.pone.0300051), 2024-03-25
Supplement: pone.0300051.s003.pdf [file pone.0300051.s003.pdf]

## Supporting information

**S3 Fig.** The combination index (CI) vs. fraction affected (Fa) graph for CGEtOAc in combination with sorafenib after 24 h of incubation.

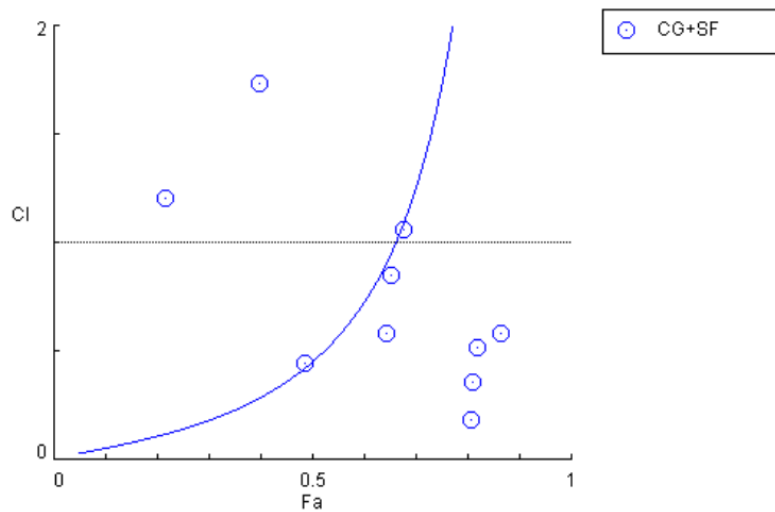

| <b>CGEtOAc (<math>\mu\text{g/mL}</math>)</b> | <b>Sorafenib (<math>\mu\text{M}</math>)</b> | <b>CI</b> |
|----------------------------------------------|---------------------------------------------|-----------|
| 200                                          | 2                                           | 1.20      |
| 400                                          | 2                                           | 2.46      |
| 600                                          | 2                                           | 1.73      |
| 800                                          | 2                                           | 2.18      |
| 200                                          | 4                                           | 0.45      |
| 400                                          | 4                                           | 0.58      |
| 600                                          | 4                                           | 0.85      |
| 800                                          | 4                                           | 1.06      |
| 200                                          | 8                                           | 0.18      |
| 400                                          | 8                                           | 0.36      |
| 600                                          | 8                                           | 0.52      |
| 800                                          | 8                                           | 0.58      |
