# Supplementary material for: Combination of ethyl acetate fraction from Calotropis gigantea stem bark and sorafenib induces apoptosis in HepG2 cells
Source: PubMed Central journal article supplement (PMC10962855; doi:10.1371/journal.pone.0300051), 2024-03-25

## Supporting information

**S4 Fig.** The migration rate of HepG2 cells treated with CGEtOAc at 400  $\mu\text{g}/\text{mL}$  and sorafenib at 4  $\mu\text{M}$ , both singly and in combination, was evaluated using a wound healing assay after 0-72 h of incubation and compared to the vehicle group. Cells treated with 0.8% DMSO represented the vehicle control. The significant differences in data, presented as the mean  $\pm$  SD from at least three different experiments, were investigated with a one-way ANOVA using Tukey's HSD test: <sup>a</sup>;  $p < 0.05$  compared to 24 h of incubation in the vehicle group, <sup>b</sup>;  $p < 0.05$  compared to 48 h of incubation in the vehicle group, and <sup>c</sup>;  $p < 0.05$  compared to 72 h of incubation in the vehicle group.

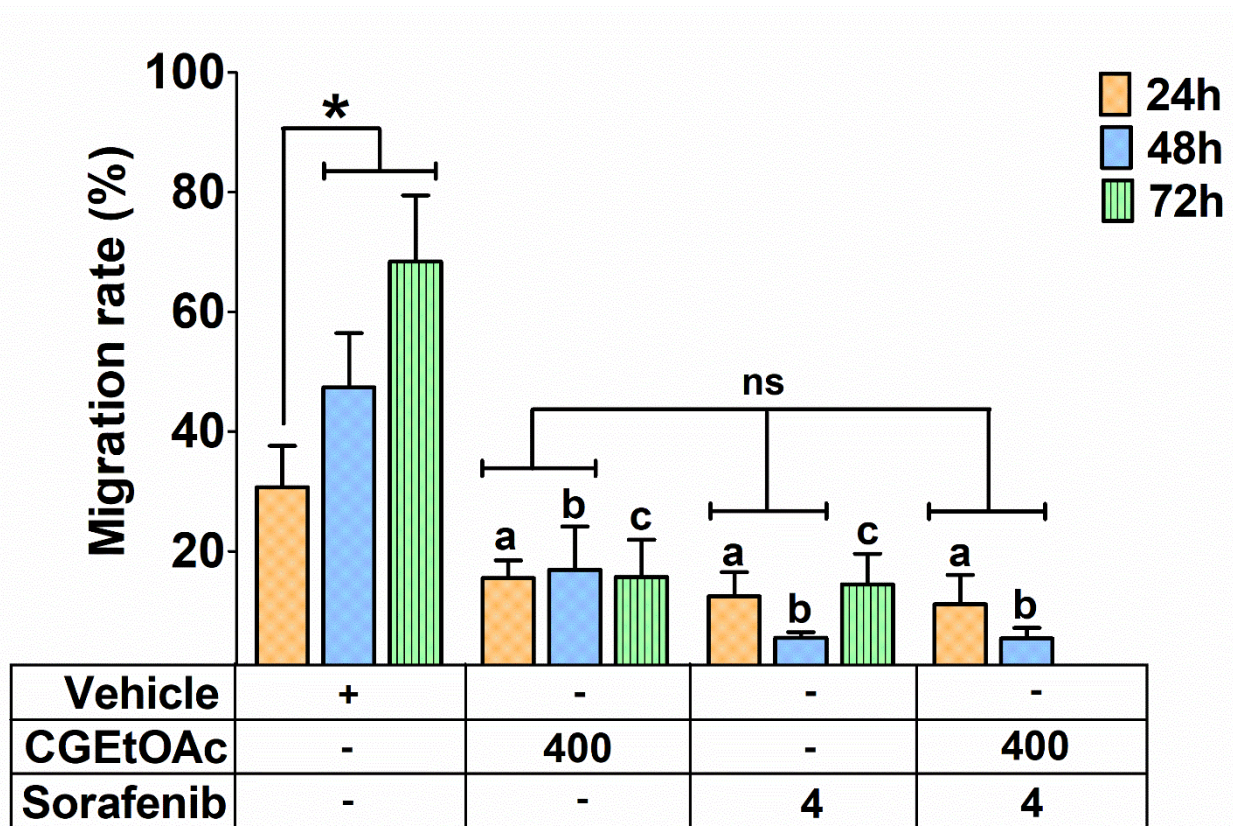

Supplement: pone.0300051.s004.pdf [file pone.0300051.s004.pdf]
