# Supplementary material for: Combination of ethyl acetate fraction from Calotropis gigantea stem bark and sorafenib induces apoptosis in HepG2 cells
Source: PubMed Central journal article supplement (PMC10962855; doi:10.1371/journal.pone.0300051), 2024-03-25
Supplement: pone.0300051.s005.pdf [file pone.0300051.s005.pdf]

# Supporting information

**S5 Raw images displaying the gating strategies used in flow cytometry of annexin V and propidium iodide (PI) staining in HepG2 cells after 24 h of incubation, with a combination of 400 µg/mL CGEtOAc and 4 µM sorafenib.**

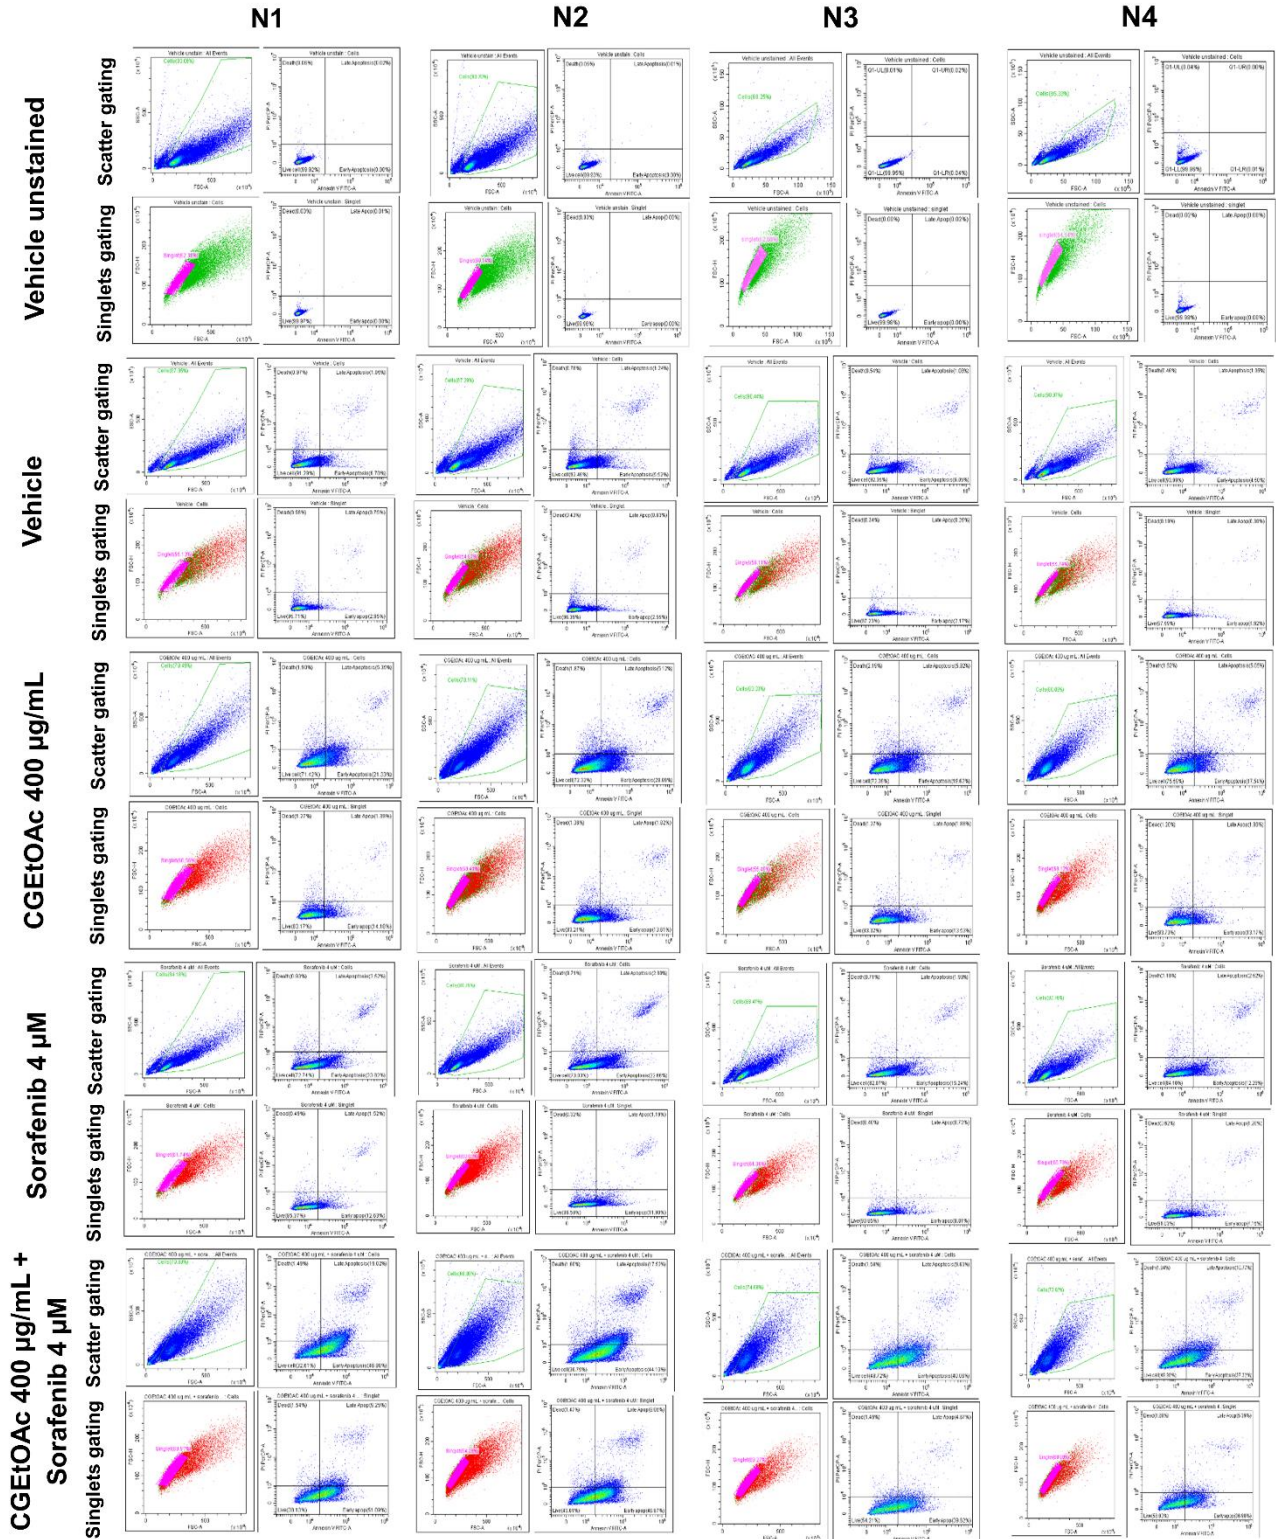

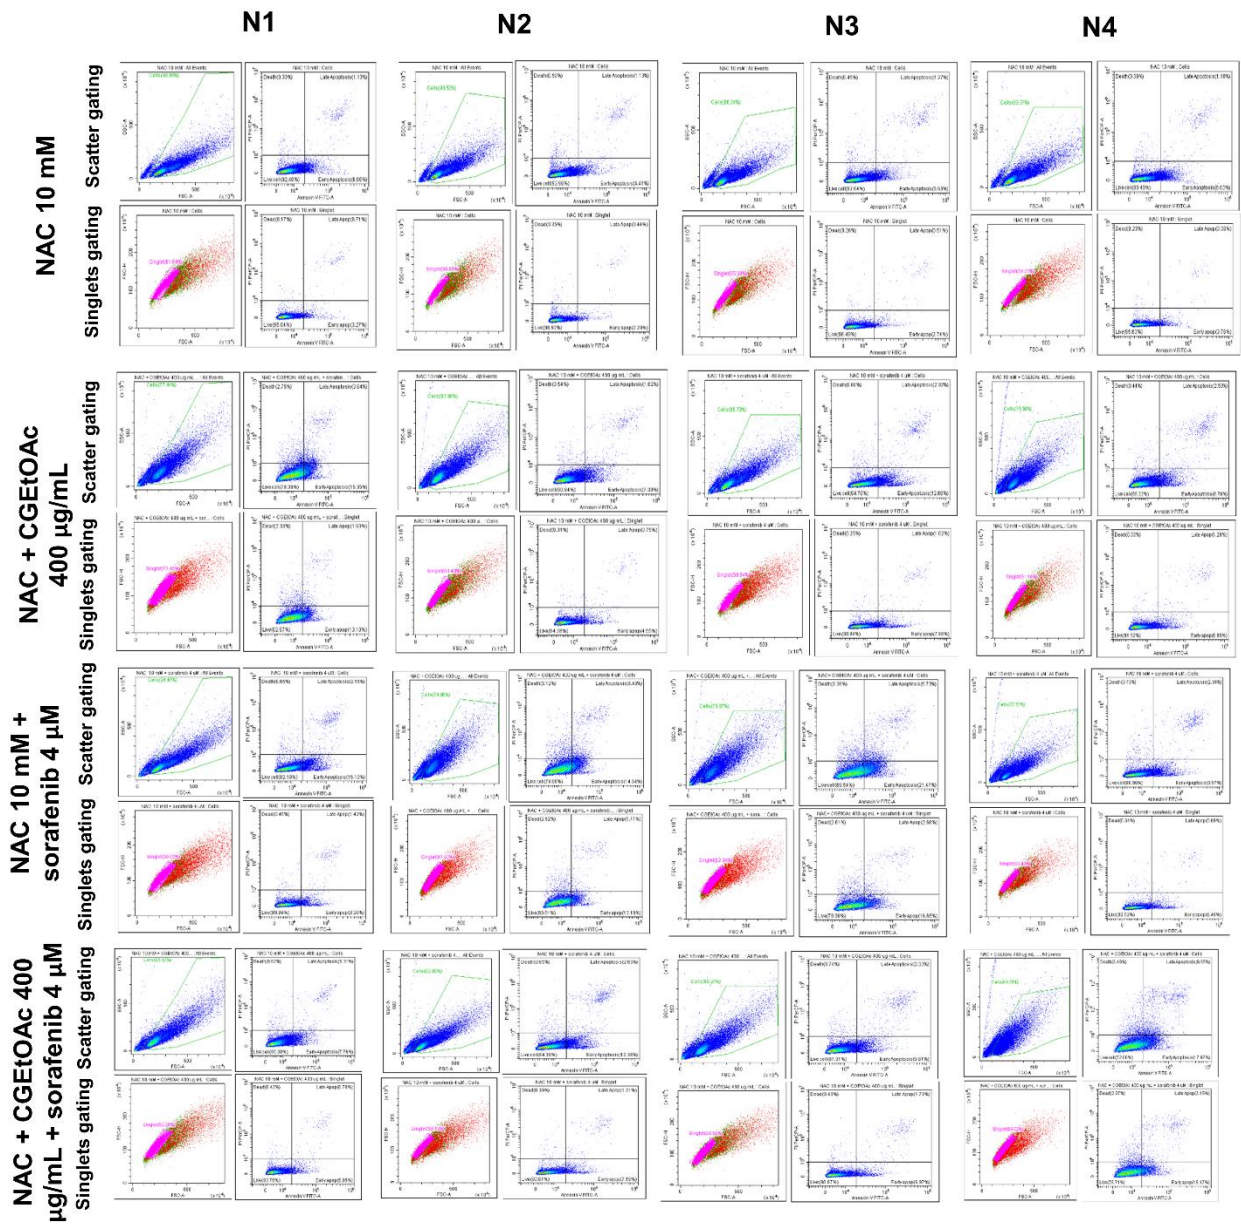

Apoptosis rate by scatter gating

Apoptosis rate by singlets gating

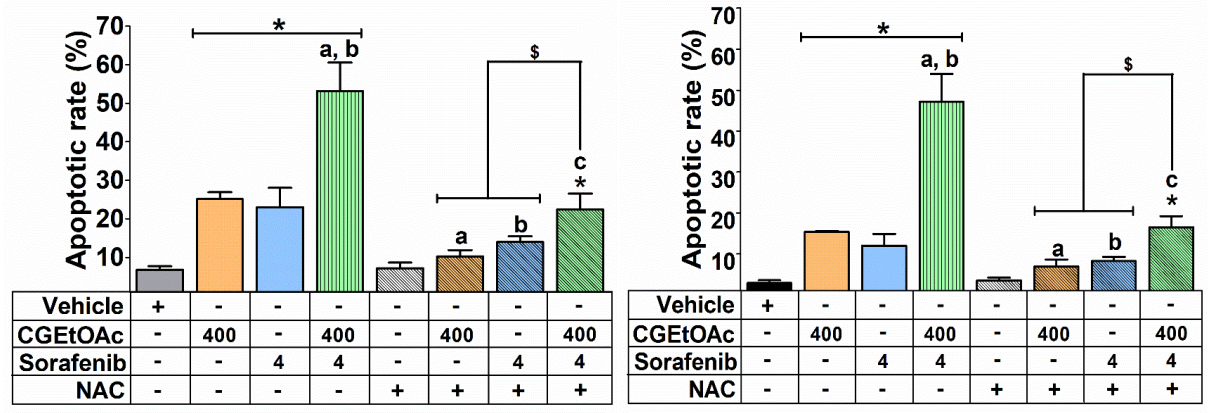

# The gating strategy of flow cytometry of annexin V and PI

## Sorafenib treatment

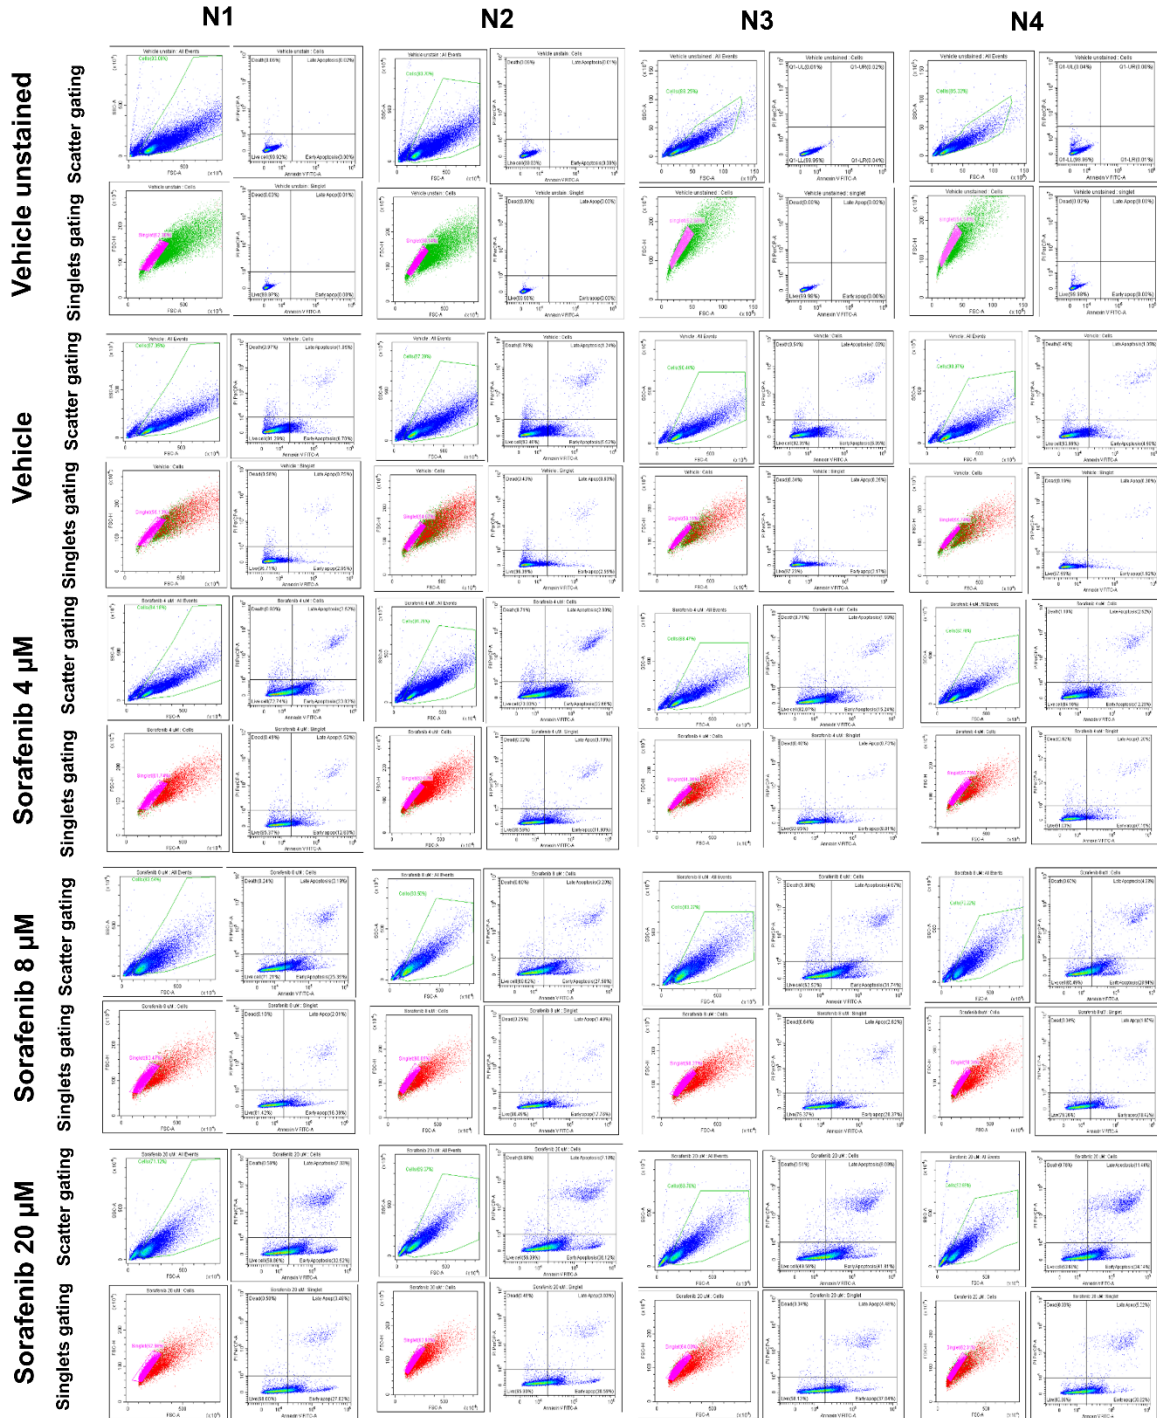

### Apoptosis rate of sorafenib treatment by scatter gating

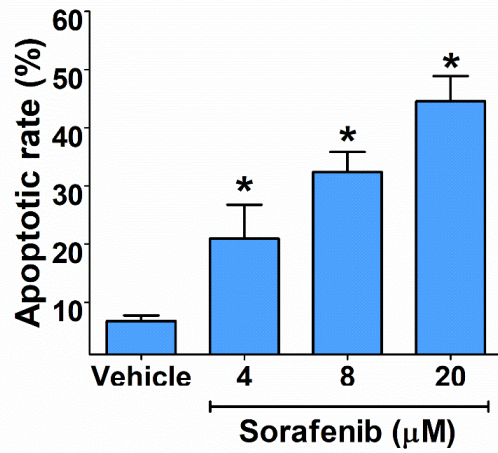

### Apoptosis rate of sorafenib treatment by singlets gating

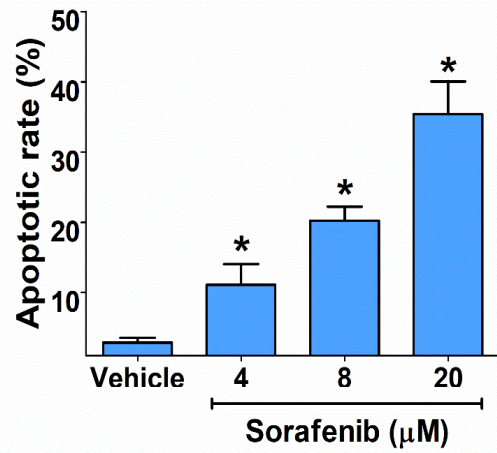

### Flow cytometry setting

Acquisition

Initialize Record Restart

Standby Backflush Eject

Auto Record Acq. Setting...

Events/Sec: 319

Abort(%): 1.16

Events: 32782

Time: 00:01:43

Events to Display: 5000 Events

Events to Record: 20000 Events

in Cells

Time to Record: 600 Sec

Volume to Record: 10  $\mu\text{L}$

Sample Flow Rate: 60  $\mu\text{L}/\text{min}$

Slow  Medium  Fast

Custom
